# Supplementary material
Source: publisher site journal article supplement (https://www.spandidos-publications.com/1818/downloadSupplementary)

Figure S1. RES/DDP cotreatment inhibits cell viability and promotes cell apoptosis in GC cells. (A) Cell viability was detected by CCK-8 assay after RES and DDP cotreatment in KATO III, MKN-45 and NCI-NB7 cells. (B) FITC-Annexin V/PI assays and flow cytometry were performed to evaluate cell apoptosis after RES/DDP cotreatment for 48 h in KATO III and MKN-45 cells. (C) The percentage of apoptotic cells was determined. The data are presented as the mean  $\pm$  SD (n=3). \* $P$ <0.05, \*\* $P$ <0.01 and \*\*\* $P$ <0.001. RES, resveratrol; DDP, cisplatin; GC, gastric cancer; CCK-8, Cell Counting Kit-8; CTRL, control; COM, combination treatment.

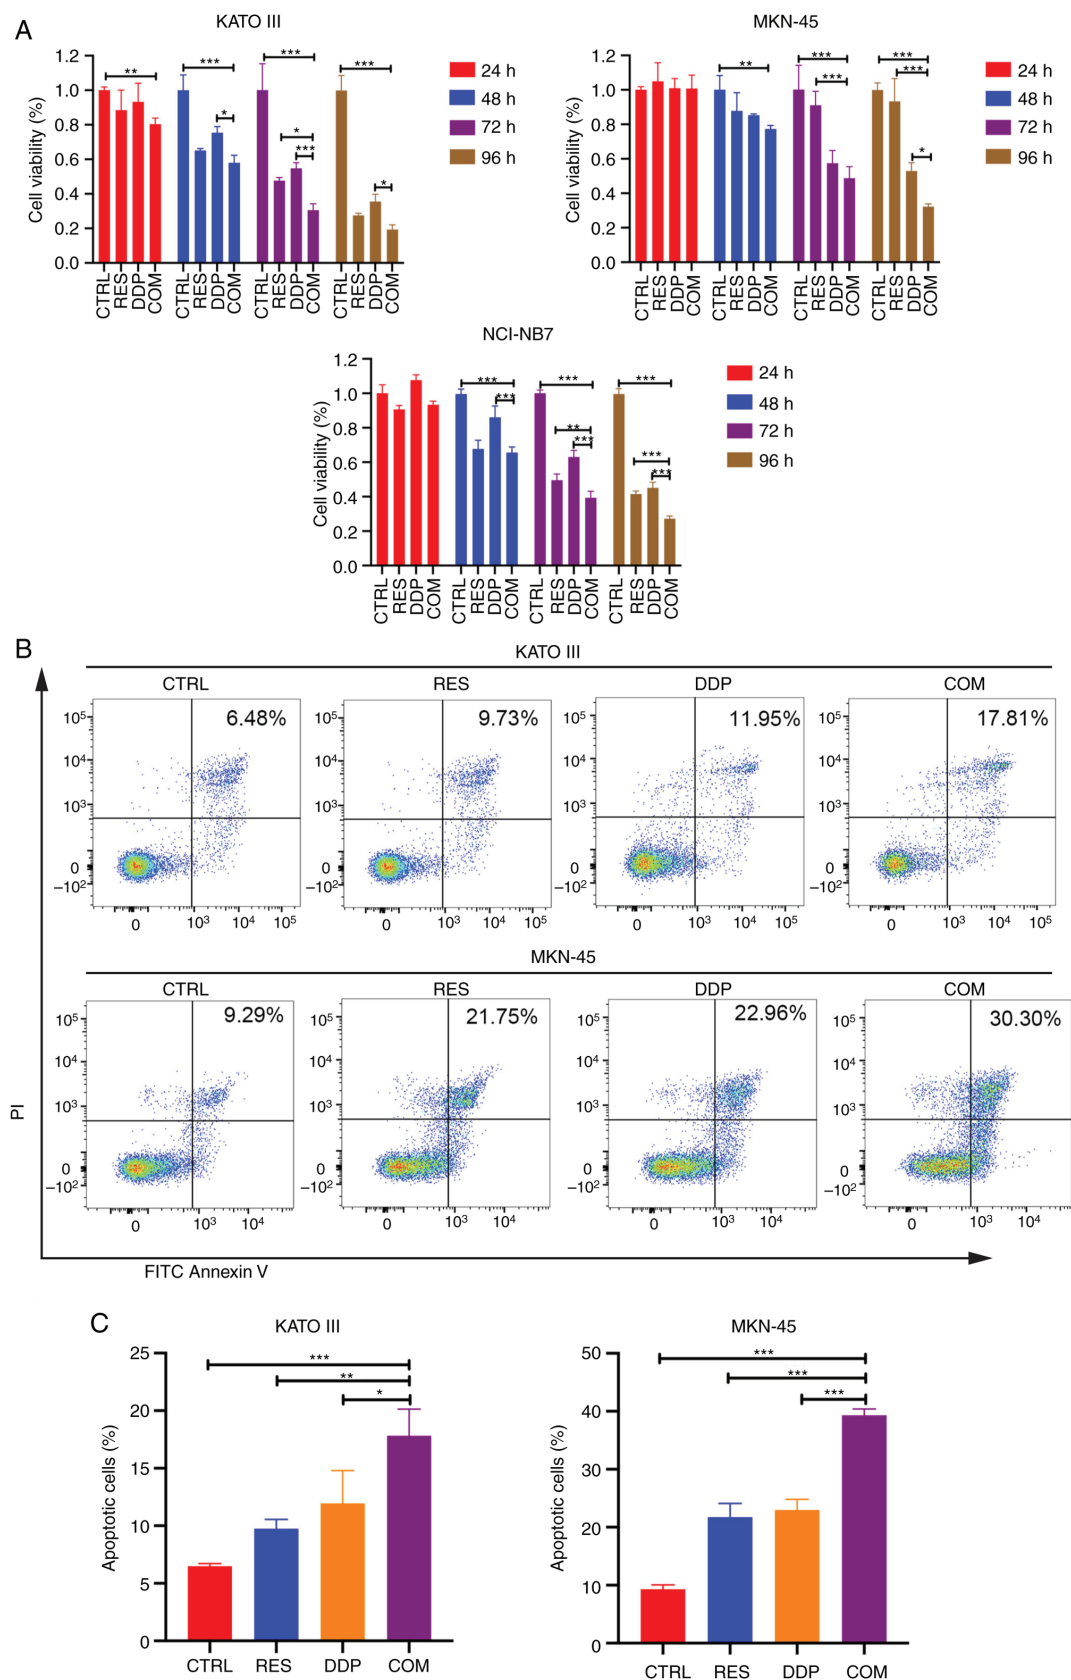

Supplement: Supplementary file 1 [file downloadSupplementary]
